# Supplementary material for: Acute effects of contract-relax proprioceptive neuromuscular facilitation stretching of hip abductors and adductors on dynamic balance
Source: PeerJ. 2018 Dec 13;6:e6108. doi: 10.7717/peerj.6108 (PMC6295325; doi:10.7717/peerj.6108)
Supplement: Supplemental Information 1 [file peerj-06-6108-s001.xlsx]

## Sheet: Data
Group	Sex	Trial1	GI_1	TA_1 [°s]	EA_1 [°s]	ET_1 [s]	RT_1 [s]	Trial2	GI_2	TA_2 [°s]	EA_2 [°s]	ET_2 [s]	RT_2 [s]
IG	Male	Pre	7.8	117.8	26.5	7.4	2.4	Post	3.5	68.1	2.9	3.4	0.9
IG	Male	Pre	3.8	78.1	3.3	2.8	1.3	Post	1.8	49.3	0	0	0
IG	Male	Pre	3	64.5	4.1	1.4	1.1	Post	3.6	60.7	5	3.1	1.1
IG	Male	Pre	4.4	83.9	6.2	4.6	1.1	Post	2	49.3	0.3	0.6	0.6
IG	Male	Pre	4	74	7.3	3.5	1.6	Post	3.3	63.8	3.4	2.7	1.6
IG	Male	Pre	4.2	81.9	4.1	4.1	1.3	Post	2.6	66.7	0.2	0.5	0.3
IG	Male	Pre	5.5	91.2	8.3	6.9	0.9	Post	2.6	60.4	1.9	1.3	0.5
IG	Male	Pre	2	50.9	0.2	0.3	0.3	Post	1.9	52.3	0.1	0.1	0.1
IG	Male	Pre	2.5	62	0.4	0.7	0.5	Post	2.2	57.3	0.2	0.3	0.2
IG	Male	Pre	2.6	62	0.6	1	0.7	Post	1.8	45.5	0.2	0.3	0.3
IG	Male	Pre	3.8	74.1	3.4	3.7	1.1	Post	2.6	58.8	1.7	1.1	1.1
IG	Female	Pre	3.9	76.4	5.2	3	1.6	Post	4.4	77	1	3.8	1.6
IG	Female	Pre	2.1	52.5	0.4	0.6	0.5	Post	2.2	55.3	0.5	0.5	0.5
IG	Female	Pre	2.1	47.8	1.3	0.9	0.5	Post	3	65.8	2.1	1.7	1.1
IG	Female	Pre	2.1	57.6	0	0.2	0.2	Post	1.9	47.7	0.1	0.4	0.4
IG	Female	Pre	3.3	72.1	3.1	2.3	0.7	Post	2	48.4	0.4	0.6	0.4
IG	Female	Pre	5.1	89.8	10.7	5.3	1.7	Post	2.4	63.1	0.1	0.6	0.2
IG	Female	Pre	5.4	89.1	9.9	5.6	3	Post	1.7	48.8	0	0	0
IG	Female	Pre	4.2	75.3	15.3	2.7	2	Post	3	67.3	2.5	1.8	0.7
IG	Female	Pre	3	66.2	2	1.6	1.1	Post	2.1	53.1	0.6	0.7	0.3
IG	Female	Pre	2.1	49.1	1	0.9	0.6	Post	2.2	60.4	0	0	0
IG	Female	Pre	2.7	57.9	1.2	1.5	1.1	Post	2.2	51.4	1	1.1	0.5
IG	Female	Pre	2.1	47.7	0.7	1	0.7	Post	1.4	38.1	0	0	0
IG	Female	Pre	2.5	61.9	0.6	0.8	0.6	Post	3.3	70	1.9	2.4	1.2
IG	Female	Pre	4.2	79.1	7.1	3.5	1.9	Post	2	54.7	0.1	0.2	0.2
IG	Female	Pre	2.2	47.6	1.9	1.2	0.8	Post	1.6	45.4	0	0	0
IG	Female	Pre	5	91.4	4.9	5	2.5	Post	1.8	49.8	0	0	0
IG	Female	Pre	3.3	65.7	4.5	2.6	1	Post	3.3	63.5	3.5	2.7	1.4
IG	Female	Pre	3.4	65.3	7.2	2.5	1.2	Post	3.2	70.9	2	2.3	0.7
IG	Female	Pre	2.2	52.5	0.8	0.7	0.5	Post	1.6	40.7	0.1	0.3	0.3
IG	Female	Pre	2.6	59.1	0.8	1.2	0.8	Post	1.7	45.4	0.1	0.2	0.2
CG	Male	Pre	2	50.5	0.4	0.6	0.3	Post	2.2	53.2	0.4	0.7	0.5
CG	Male	Pre	4.1	68.5	18.7	2.3	2.3	Post	2.4	57.1	0.7	1	0.5
CG	Male	Pre	3	64.5	4.1	1.4	1.1	Post	3.6	60.7	5	3.1	2.6
CG	Male	Pre	4.2	81.9	4.1	4.1	1.3	Post	2.6	66.7	0.2	0.5	0.3
CG	Male	Pre	5.2	93.6	4.9	6.2	1.5	Post	5.4	93.9	7.5	6.3	1.8
CG	Female	Pre	3.3	65.7	4.5	2.6	1	Post	3.3	63.5	3.5	2.7	1.4
CG	Female	Pre	2.4	57.5	0.6	1	0.4	Post	2.8	60.7	2.3	1.8	0.9
CG	Female	Pre	3.2	71.3	1.8	2.1	0.7	Post	2.7	63.6	1.3	1.5	0.4
CG	Female	Pre	3.4	73	2.7	2.3	1.1	Post	2.9	67	0.3	1.7	0.8
CG	Female	Pre	4.1	68.5	18.7	2.3	2.3	Post	2.4	57.1	0.7	1	0.5
CG	Female	Pre	4.1	85.1	3.4	3.5	0.8	Post	4.5	84.1	7.4	3.3	2.6
CG	Female	Pre	3.7	69	7.6	2.6	1.8	Post	3.3	71.1	3	1.9	1.3
CG	Female	Pre	5.4	91.6	8.9	5.6	2.8	Post	6.9	109.1	19.3	7.2	3.5
CG	Female	Pre	2.6	55.6	1.6	1.4	1.2	Post	5	85.2	6	5.2	3.1
